# Supplementary material for: Rapamycin/sodium hyaluronate binding on nano-hydroxyapatite coated titanium surface improves MC3T3-E1 osteogenesis
Source: PLoS One. 2017 Feb 9;12(2):e0171693. doi: 10.1371/journal.pone.0171693 (PMC5300161; doi:10.1371/journal.pone.0171693)
Supplement: S3 Table — (XLSX) [file pone.0171693.s003.xlsx]

## Sheet: 3A RA release% short-term
Days	Rapa-Ti			Rapa-NTs			Rapa-HAp/NTs
0	0	0	0	0	0	0	0	0	0
1	3.17	1.56	1.54	1.73	1.15	1.33	1.33	1	0.75
2	25.4	29.69	35.38	7.34	14.55	11.76	3.2	2.4	2.07
5	73.02	75	80	15.33	15.94	12.65	6.49	5.14	4.8
12	84.13	82.81	89.23	33.05	45.27	27.52	13.97	11.11	9.77
24	90.48	82.81	78.46	55.29	53.81	49.94	18.06	15.17	13.99
48	85.71	89.06	87.69	51.19	63.05	65.26	19.93	22.8	21.36
72	100	96.88	93.85	70.41	83.83	69.92	34.25	29.19	25.99

## Sheet: 3A RA release% long-term
Days	Rapa-Ti			Rapa-NTs			Rapa-HAp/NTs
0	0	0	0	0	0	0	0	0	0
2	84.38	89.06	87.69	33.69	30.72	27.75	18.45	23.83	21.57
5	90.63	81.25	95.38	60.8	69.75	78.02	38.14	36.74	42.06
10	92.19	98.44	95.38	86.83	91.92	93.01	61.29	65.25	61.2
15	96.88	96.88	92.31	87.04	92.61	89.23	68.53	72.88	73.75
20	96.88	95.31	87.69	90.06	96.07	90.01	76.94	80.76	80.35
25	98.44	95.31	98.46	92.66	98.5	91.45	91.27	95.58	92.31
30	93.75	95.31	96.92	97.41	97.23	98	99.01	98.96	98.91

## Sheet: 3B mTOR 
											+RA/SH
		PT			NT			HAp/NT			PT			NT			HAp/NT
2 Days	p-mTOR	1.15	0.852857	0.858601	0.715108	0.662269	0.465152	0.497183	0.700315	0.636824	0.289474	0.221113	0.275862	0.227334	0.130168	0.0965732	0.100437	0.098916	0.0858586
	mTOR	0.757812	0.638571	0.5	0.789928	0.684697	0.590909	0.81831	0.881703	0.743243	0.993421	0.841655	0.763547	0.818674	0.710567	0.641745	0.774381	0.887534	0.429293
8 Days	p-mTOR	0.646281	0.42549	0.557093	0.574043	0.365138	0.451282	0.69281	0.561905	0.532423	0.937075	1.03785	0.965392	0.24	0.23049	0.267139	0.0458404	0.0622896	0.0747508
	mTOR	0.842975	0.823529	0.802768	0.78203	0.754128	0.77265	0.728758	0.878095	0.808874	0.697279	0.806773	0.799636	0.551429	0.715064	0.992908	0.544992	0.513468	0.55814

## Sheet: 3C cell vitality
	Rapa-Ti			Rapa-NTs			Rapa-HAp/NTs			HAp/NTs
2	3.03333	4.1	2.4	3.4	4.2	2.4	4.03333	4.76667	3.06667	2.2	3.2	3.26667
4	4.1	4.4	4.73333	6.46667	6.06667	5.8	6.46667	4.53333	6.1	4.5	4.53333	6.06667
6	6.2	7.53333	7.8	7.16667	7.5	9.53333	7.2	7.56667	7.83333	8.83333	7.46667	9.06667
8	8.56667	10.5333	7.5	9.9	7.6	9.53333	7.06667	9.76667	10.5333	12	12.1333	10.3667

## Sheet: 3C ALP activity
	Rapa-PT			Rapa-NTs			Rapa-HAp/NTs			HAp/NTs
7	0.592	0.722	0.675	0.926	0.723	0.874	1.182	1.013	1.096	0.244	0.346	0.483
14	1.035	1.198	1.187	1.597	1.787	1.377	2.003	2.236	2.183	0.451	0.536	0.561
21	1.238	1.161	1.294	1.312	1.683	1.357	2.505	2.102	2.369	0.636	0.726	0.672

## Sheet: 3C Mineralization ability
	Rapa-PT			Rapa-NTs			Rapa-HAp/NTs			HAp/NTs
21 Days	1.324	0.932	0.823	1.642	1.884	1.534	2.632	2.242	2.042	1.532	1.642	1.342

## Sheet: 3C mRNA expression
	Rapa-PT			Rapa-NTs			Rapa-HAp/NTs			HAp/NTs
OCN	0.46088	0.5468	0.47946	1.13331	0.93816	1.23755	2.6442	2.82008	2.62446	1.2442	1.77608	1.48846
OPN	2.36175	1.55313	1.90976	3.18624	2.21657	2.66568	3.8426	2.89487	4.5932	2.1226	1.56487	2.7932
Collagen-I	0.73704	0.9517	1.39664	1.80352	1.44664	1.11399	2.387	2.57354	2.61345	1.895	1.47754	1.77845
Runx2	0.22688	0.64658	0.60704	1.41488	0.88952	1.1654	1.4954	1.66028	1.83992	0.9674	0.66628	0.51992
